# Supplementary material for: Pesticide-induced resurgence in brown planthoppers is mediated by action on a suite of genes that promote juvenile hormone biosynthesis and female fecundity
Source: eLife. 2025 Sep 30;12:RP91774. doi: 10.7554/eLife.91774 (PMC12483516; doi:10.7554/eLife.91774)
Supplement: Figure 1—figure supplement 1—source data 1. [file elife-91774-fig1-figsupp1-data1.xlsx]

## Sheet: figure 1.S
Figure 1-figure supplement
			figure1.S1A					figure1.S1B						figure1.S1C							figure1.S2A					figure1.S2B					figure1.S2C
				Control	LC15	LC50			Control	LC15	LC50				Nymph	Adult					Control	LC15	LC50			Control	LC15	LC50			Control	LC15	LC50
				247	367	303			143	312	328				92	0					46	55	35			51	30	22			51	49	37
				203	388	267			253	294	310				60	0					27	46	52			64	12	29			64	46	33
				239	297	288			182	307	267				165	0					33	53	48			36	41	36			36	42	48
				188	303	171			264	288	293				145	0					54	28	45			54	27	47			54	32	44
				218	259	228			155	341	463										28	40	23			44	35	31			44	31	29
				169	177	325			163	335	381										45	45	41			73	29	25			73	51	28
				196	233	347			294	264	347										55	19	36			59	18	23			59	58	36
				219	366	298			177	273	321										47	36	34			68	47	31			68	44	45
				273	227	236			224	313	360										40	47	43			41	19	26			41	63	33
				181	279	313			152	358	429										72	38	31			30	39	22			30	29	21
				241	183	369			138	362	434										37	49	28			55	51	36			55	38	43
				190	263	247			212	317	397										30	25	24			67	33	31			67	55	40
				221	316	292			236	269	476										56	22				39	42	40			39	49	47
									194	312											47	38				68	36	28			68	62	26
																					58	22				41		37			41	47	35
																					60	51
																					62
																					68
			figure1.S2D					figure1.S2E					figure1.S2F
			Control	LC15	LC50			Control	LC15	LC50			Control	LC15	LC50
			152	155	130			152	177	166			152	106	144
			117	167	108			117	192	128			117	154	138
			139	135	129			139	108	139			139	183	124
			155	122	195			155	159	204			155	117	148
			106	159	157			106	144	183			106	129	143
			141	194	129			141	178	209			141	159	155
			120	228	154			120	165	122			120	144	168
			194	104	188			194	173	143			194	126	109
			183	117	150			183	144	108			183	185	148
			109	156	172			109	169	195			109	109	124
			104	164	166			104	143	117			104	94	137
			128	147	114			128					128	113
			131	143	143			131					131	154
			143	174	125			143					143
			118	151	170			118					118
			144	188	145			144					144
			159	146	177			159					159
			163	153	153			163					163
			122	171	116			122					122
			178	146	152			178					178
			164	204	168			164					164
			173	188				173					173
			145	192				145					145
			figure1.S2G						figure1.S2H					figure1.S3A				figure1.S3B				figure1.S3C				figure1.S3E				figure1.S3F
			Control	LC10	LC30	LC50			Control	LC15	LC50			Control	Emamectin benzoate			Control	Emamectin benzoate			Control	Emamectin benzoate			Control	Emamectin benzoate			Control	Emamectin benzoate
			27	2	3	4			17	3	3			54	42			0.91	0.865			0.62	0.54			0.79	0.838			3.6	4.2
			25	2	1	2			18	4	2			59	45			0.92	0.88			0.56	0.6			0.72	0.852			4.1	3.3
			25	4	3	3			17	3	5			63	45			0.94	0.91			0.61	0.63			0.77	0.857			3.4	3.7
			21	3	2	1			24	2	4			60	48			0.82	0.8			0.68	0.53			0.78	0.92			4.2	3.9
			28	1	2	3			19	2	3			51	51			0.84	0.82			0.5	0.51			0.76	0.86			3.7	3.7
			23	3	4	2			27	4	3			59	47			0.78	0.8			0.56	0.53			0.77	0.84			3.5	4.1
			24			6			22	0	4			67	56											0.74				4.1	4.2
			21			2			20	4	2			53	48											0.79				3.7	4.3
			20			5			16	5	6			57	44															3.6	4.1
									23	1	4			55	53															3.7	4.2
									26	1	7																			3.9	4
									28	3	5																			4.1	3.8
									21	8	7																			3.4	4.4
									25	5	5																			3.9	3.9
									34	4	3																			3.6	4.3
									6	3	2																			3.3	2.5
			figure1.S3D						18	8	0																			3.7	3.1
			Days	Control	Days	Emamectin benzoate			2	5	4																			4.1	2.5
			1	1	4	1			21	4	0																			2	2.7
			5	1	4	1			4	3	0																			3.7	2.6
			5	1	5	1			19	0	0																			2.8	3
			5	1	5	1			22	1	0																			2.7	3.4
			5	1	6	1			14	1	0																			2.6	3.3
			5	1	6	1			26	0	0																			2	3.5
			6	1	6	1			21	0	0																			2.3	2.8
			6	1	6	1			26	0	0																			3	3.1
			7	1	6	1			24	0	0																			2.6	2.6
			7	1	7	1			29	0	0																			2	2.1
			7	1	7	1			5	2	0																			3	3.2
			7	1	7	1			22	0	0																			2.3	3.1
			8	1	7	1			12	0	0																			2	2.6
			8	1	8	1			17	0	0																			2.8	2.5
			8	1	8	1			0	1	0																			2	2.5
			8	1	8	1			22	0	0																			1.7	2.6
			8	1	8	1			5	0	0																			2.4	2.6
			8	1	8	1			27	0	0																			2.2	2
			9	1	8	1			36	0	0																			1.3	2.7
			9	1	8	1			0	0	0																			2.2	2.9
			9	1	9	1			4	0	0																			2.6	3.7
			10	1	9	1			18	0	0																			2.1	3.9
			10	1	9	1			4	0	0																			2	3.6
			11	1	9	1			17	0	0																			2.1
			11	1	10	1			4	1	0																			2.9
			11	1	10	1			1	0	0																			2.3
			11	1	10	1			31	0	0																			2.1
			12	1	10	1			17	5	0																			2.1
			12	1	10	1			23	0	0																			2.2
			12	1	10	1			15	6																				2.3
			12	1	11	1			7	1																				2.3
			12	1	11	1			30	0																				2.4
			12	1	11	1				0																				2.3
			12	1	11	1				1
			13	1	11	1				0
			13	1	11	1				0
			13	1	12	1				1
			14	1	12	1				0
			14	1	12	1
			14	1	12	1
			14	1	12	1
			14	1	12	1
			14	1	12	1
			14	1	12	1
			14	1	13	1
			15	1	13	1
			15	1	13	1
			15	1	14	1
			15	1	14	1
			16	1	14	1
			16	1	14	1
			16	1	14	1
			17	1	14	1
			17	1	14	1
			17	1	15	1
			17	1	15	1
			17	1	15	1
			17	1	16	1
			17	1	16	1
			18	1	16	1
			18	1	16	1
			18	1	16	1
			18	1	17	1
			19	1	17	1
			19	1	17	1
			19	1	17	1
			20	1	17	1
			20	1	18	1
			20	1	19	1
			20	1	19	1
			20	1	19	1
			21	1	19	1
			22	1	19	1
			22	1	20	1
			22	1	20	1
			22	1	20	1
			24	1	21	1
			24	1	22	1
			24	1	22	1
			25	1	22	1
			25	1	23	1
			25	1	23	1
			25	1	23	1
			28	1	24	1
			28	1	24	1
			28	1	25	1
			29	1	26	1
			29	1	26	1
			29	1	26	1
			30	1	27	1
			31	1	27	1
			31	1	27	1
			31	1	28	1
			31	1	28	1
			33	1	29	1
			34	1	30	1
			35	1	30	1
			35	1	31	1
			36	1	33	1
			38	1	34	1
