# Supplementary material for: Pesticide-induced resurgence in brown planthoppers is mediated by action on a suite of genes that promote juvenile hormone biosynthesis and female fecundity
Source: eLife. 2025 Sep 30;12:RP91774. doi: 10.7554/eLife.91774 (PMC12483516; doi:10.7554/eLife.91774)
Supplement: Figure 1—source data 1. [file elife-91774-fig1-data1.xlsx]

## Sheet: Sheet1
Figure 1.Fecundity of BPH following exposure to sub-lethal (LC15) and median lethal (LC50) concentrations of emamectin benzoate
	figure1A	Control	LC15	LC50		figure1B	Control	LC15	LC50		figure1C	Control	LC15	LC50			figure1D	Control	LC15	LC50		figure1E	Control	LC15	LC50		figure1F	Control	LC15	LC50
		211	155	287			138	178	313			211	274	251				224	254	266			224	254	314			224	173	144
		203	194	303			127	233	264			203	124	188				186	237	291			186	298	275			186	161	186
		276	255	221			121	195	274			276	253	206				177	198	304			177	332	307			177	255	208
		303	297	198			107	179	301			303	146	186				239	268	312			239	311	333			239	238	261
		134	248	276			89	201	224			134	174	147				282	281	351			282	313	340			282	211	204
		183	309	299			112	243	247			183	206	235				257	224	236			257	268	297			257	186	213
		159	324	256			107	228	230			159	234	274				143	217	217			143	271	359			143	154	228
		206	287	213			123	240	199			206	159	248				166	264	193			166	294	394			166	137	191
		251	158	306			121	202	306			251	218	191				198	303	244			198	355	388			198	208	177
		277	366	329			108	173	189			277	151	224				164	321	271			164	246	403			164	246	164
		140	321	344			143	268	229			140	277	210				234	187	239			234	212	297			234	231	201
		181	384	371			253	336	340			181	244	193				209	255	301			209	193	312			209	204	239
		128	366	335			182	327	297			128	235	176				218	241	273			218	221	374			218	211	228
		154	327	322			264	317	262			154	168	247				231	239	249			231	203	303			231	208	274
		177	351	157			155	294	249			177	324	239				204	266	211			204	179	227			204	195	266
		139	287	174			163	355	255			139	343	147				193	173	203			193		231			193	188	171
							294	311	435
							177		594
							224		373
							152		409
							138		312
							236		454
							194		397
							212		388
							163		359
							171		491
							135		407
							123		381
							261		512
							147		484
									381
