# Supplementary material for: Pesticide-induced resurgence in brown planthoppers is mediated by action on a suite of genes that promote juvenile hormone biosynthesis and female fecundity
Source: eLife. 2025 Sep 30;12:RP91774. doi: 10.7554/eLife.91774 (PMC12483516; doi:10.7554/eLife.91774)
Supplement: Figure 2—figure supplement 1—source data 1. [file elife-91774-fig2-figsupp1-data1.xlsx]

## Sheet: figure 2.S
Figure 2-figure supplement
			figure2.S1	Control														emamectin benzoate
				0	7	27	8	1	26	31	21	25	19	9	21	17	17	20	31	14	26	16	30	19	25	29	44	24	35	20	25	16
		figure2.S3A		Control			Emamectin benzoate				figure2.S3B		Control			Emamectin benzoate						figure2.S3C		Control			Emamectin benzoate					figure2.S3D		Control			Emamectin benzoate
			5L	0.39	0.33	0.48	0.48	0.45	0.54			5L	25	28.3	26	33.8	35.3	30.5					5L	102	96	81.2	104	114.8	102.8				5L	21.2	22.7	15.5	25.5	24.5	21
			1	0.45	0.51	0.6	0.54	0.48	0.6			1	28.3	27.3	25.5	30	32.5	28.3					1	98.8	85.2	87.6	108	112.8	103.6				1	25.5	27.3	18.2	24	25.9	19.4
			2	0.42	0.57	0.39	0.66	0.54	0.51			2	31.5	29.5	26.5	31.3	33.8	31.8					2	109.2	96.4	81.6	124.8	123.6	118.8				2	21	19.2	24.8	24.8	21.1	29.4
			3	0.42	0.48	0.36	0.42	0.51	0.42			3	31.5	31.8	27.8	32.8	28.3	32.8					3	106.8	108.4	95.2	134	145.2	100.4				3	21.6	24.3	20.4	25.5	22.9	22.1
			4	0.51	0.36	0.36	0.48	0.39	0.39			4	33	27.3	22.8	32	28.5	31.8					4	97.6	93.2	101.2	144.8	140.4	131.6				4	24.8	27.2	21.5	34.1	31.2	28.7
			5	0.45	0.45	0.39	0.39	0.51	0.66			5	26.5	30.3	25.8	30.3	27	29.5					5	104.4	109.6	103.6	130.8	136.8	136.8				5	22.4	19.7	18	27.9	28.7	23.6
			6	0.45	0.42	0.39	0.33	0.51	0.45			6	28.3	32.3	27.3	30.8	34	29.5					6	100.4	80.4	93.2	132	128.2	131.2				6	21	19.9	21	21.9	23.6	22.1
			7	0.48	0.51	0.45	0.48	0.51	0.39			7	26.5	30.3	25.8	30	25.8	28					7	96	91.6	95.2	130.8	137.6	130.4				7	21.6	19.9	19.4	25.5	22.9	21.5
																						figure2.S3G		Control			Emamectin benzoate				figure2.S3H		Control			Emamectin benzoate
												figure2.S3F		Control			Emamectin benzoate						5L	4.87	4.8	4.79	4.99	4.91	4.76			5L	1.02	1.02	1.08	0.96	1.08	1.08
		figure2.S3E		Control			Emamectin benzoate						5L	12.1	9.5	10	14.6	12.7	14.2				1	4.92	4.52	4.99	4.92	4.87	4.52			1	0.99	0.96	0.93	1.08	1.2	1.2
			5L	20.7	19.98	20.88	19.98	20.34	20.52				1	7.4	8.3	9.6	12.9	11.2	14.2				2	5.19	5.19	5.34	5.3	5.14	5.19			2	1.14	1.14	1.2	1.14	1.08	1.08
			1	19.62	19.44	19.98	20.34	19.98	20.16				2	11.7	10.7	9.8	12.7	11.9	11.7				3	5.34	5.54	5.26	5.53	5.25	5.54			3	1.14	1.08	1.14	1.44	1.2	1.2
			2	20.88	21.42	20.88	21.6	21.06	21.06				3	10.8	7.7	10.8	14.2	11.9	15.3				4	5.97	5.7	5.77	6.71	6.36	5.62			4	1.08	1.14	1.2	1.14	1.2	1.2
			3	21.96	21.24	20.7	21.78	22.86	20.88				4	10	11.8	10.4	13.4	14.4	14				5	5.77	5.77	5.46	6.82	6.79	6.81			5	0.93	0.96	0.93	1.08	0.99	1.08
			4	23.04	22.86	23.22	25.92	24.66	25.92				5	11.2	9.4	11	12.9	13.8	13.6				6	6.28	6.16	6.16	6.35	6.12	6.16			6	1.02	0.96	1.12	0.93	0.9	0.96
			5	21.96	22.68	22.14	25.2	25.38	24.48				6	8.8	7.8	9.6	12.8	13.4	12.2				7	5.27	5.54	5.23	5.85	6.32	5.54			7	0.93	0.9	0.87	1.02	0.99	1.02
			6	25.02	24.3	24.66	23.94	23.4	23.94				7	11	9.7	10.9	12.2	13.7	10.6
			7	23.76	23.4	23.04	22.86	25.56	26.46
