# Supplementary material for: Pesticide-induced resurgence in brown planthoppers is mediated by action on a suite of genes that promote juvenile hormone biosynthesis and female fecundity
Source: eLife. 2025 Sep 30;12:RP91774. doi: 10.7554/eLife.91774 (PMC12483516; doi:10.7554/eLife.91774)
Supplement: Figure 2—source data 1. [file elife-91774-fig2-data1.xlsx]

## Sheet: Sheet1
Figure 2. The impact of emamectin benzoate on ovarian maturation in BPH.
	figure2B
		Control																					emamectin benzoate
	1d	22	18	20	21	17	20	17	21	16	15	17	14	18	14	15	21	23	11	14	15		16	18	16	20	19	16	18	20	18	20	23	21	22	17	14	15	17	20	16
	3d	26	30	24	27	30	29	33	26	23	30	31	23	25	27	25	21	21	22	25	24	33	29	27	31	33	27	26	29	31	28	27	33	35	32	33	35	24	25	30	31	26	27
	5d	33	35	31	37	29	31	33	27	31	35	36	33	37	27	29	30	31	37	37	39		41	38	36	39	37	38	41	36	39	41	41	40	38	43	29	37	35	39	42	40
	7d	19	21	23	20	17	25	25	30	31	25	27	23	22	21	25	27	21	22	18	31	29	23	25	23	21	27	36	33	26	27	35	30	32	31	28	23	33	28	29	30	33	29
