# Supplementary material for: Pesticide-induced resurgence in brown planthoppers is mediated by action on a suite of genes that promote juvenile hormone biosynthesis and female fecundity
Source: eLife. 2025 Sep 30;12:RP91774. doi: 10.7554/eLife.91774 (PMC12483516; doi:10.7554/eLife.91774)
Supplement: Figure 3—figure supplement 1—source data 1. [file elife-91774-fig3-figsupp1-data1.xlsx]

## Sheet: figure3.S
Figure 3-figure supplement
				figure3.S1	Control			Emamectin benzoate
				4E	0.58	0.91	0.75	0.72	0.84	0.79					figure3.S2A
				4M	0.69	0.84	0.78	0.74	0.65	0.71						dsgfp								dsKr-h1
				4L	0.75	0.85	0.8	0.73	0.73	0.74					Kr-h1	1.44	1	0.97	1.18	0.95	0.98	1.01	1.04	0.25	0.17	0.21	0.2	0.35	0.38	0.45	0.39
				5E	0.91	0.68	0.85	1.13	0.81	0.98					figure3.S2B
				5M	1.04	0.81	0.93	0.87	0.92	0.9						dsgfp				dsKr-h1
				5L	0.94	0.68	0.81	0.96	0.71	0.85					Vg	0.893829	0.763511	1.133	1.20966	0.196244	0.179379	0.118053	0.128785
				1 d	1.07	0.76	0.91	0.8	0.8	0.8
				2 d	1.08	0.96	1.02	0.97	0.85	0.91					figure3.S3A				figure3.S3B
				3 d	0.89	0.92	0.95	0.93	0.76	0.86					Control	Emamectin benzoate			Control	Emamectin benzoate
				4 d	0.88	0.98	0.93	1.01	0.76	0.89					0.477572	0.741687			0.250509	0.351235
				5 d	1.02	0.99	1.05	0.94	0.93	0.95					0.328565	0.799278			0.245943	0.509217
				6 d	1.08	1.08	1.1	0.93	0.97	0.95					0.548624	0.925339			0.322175	0.38343
				7 d	1.11	0.96	1.04	1.01	1.01	1.1					0.574767	0.631685			0.500757	0.272495
																				0.460489
																				0.378199
				figure3.S3C
				Control						Emamectin benzoate
				1.38519	1.00201	0.792785	0.90879	1.51164	1.00614	1.86704	1.4383	1.81627	2.82465	1.46708
				figure3.S3D
				Control						Emamectin benzoate
				0.782116	1.12246	1.54804	0.702234	0.940461	1.11417	1.04686	3.71263	6.90267	0.923066	5.43849	6.44799
				figure3.S4
				dsGFP						dsGFP+EB						dsKr-h1						dsKr-h1+EB
				0.602585	1.10257	1.21451	1.23929			2.15454	1.33912	1.9863	1.18728			0.20749	0.279776	0.140363	0.117813			0.279529	0.421162	0.306365	0.39871
