# Supplementary material for: Pesticide-induced resurgence in brown planthoppers is mediated by action on a suite of genes that promote juvenile hormone biosynthesis and female fecundity
Source: eLife. 2025 Sep 30;12:RP91774. doi: 10.7554/eLife.91774 (PMC12483516; doi:10.7554/eLife.91774)
Supplement: Figure 3—source data 1. [file elife-91774-fig3-data1.xlsx]

## Sheet: Sheet1
Figure 3. EB induced reproduction in BPH is mediated by components of the JH signaling pathway.
		figure3A									figure3B				figure3C							figure3D
			Control			Emamectin benzoate					Control	Emamectin benzoate			Control	Emamectin benzoate						Control	methoprene	pyriproxyfen
		4E	6.2	6.4	6.6	5.6	4.7	6.1			0.6	0.21			1.96	2.74						163	186	389
		4M	6.7	6.3	6.5	5.3	5.1	4.9			0.28	0.13			1.42	3.27						171	297	284
		4L	6.4	6.3	6.6	4.7	5.6	4.5			0.31	0.21			1.18	4.19						135	334	297
		5E	6.1	7.1	6.5	5.1	5.7	6.7			0.82	0.42			1.78	4.02						123	311	191
		5M	5.3	6.3	6.9	5.9	6.6	6.3			0.73	0.25			1.99	4.12						147	141	219
		5L	5.8	7.1	7.1	7	5.9	5.7							0.54	2.6						143	156	239
		1	6.1	7.9	5.3	6.8	8.1	6.7							2.56	4.08						182	323	306
		2	5.6	4.9	6.1	7.5	7.6	8							2.52	2.5						155	147	175
		3	5.5	6.4	6.4	7.2	7.7	7.2							2.72	2.44						163	176	266
		4	5.3	6.5	6.7	7	8	7.7							1.46	1.31						194	244	408
		5	6.6	6.5	6.7	6.9	8	7.5							1.56	1.4						177	271	297
		6	5.8	6.5	7.2	6.7	7.9	7.8							1.74	1.46						224	229	354
		7	5.7	6.9	6.9	6.4	7.1	7.5							0.2	0.81						152	301	329
															0.65	0.97						138	258	377
															1.1	0.8						268		193
															0.28	0.99						156		348
															0	0.8						244		311
																						229		397
																						271		262
																						234		299
					figure3E	Control								Emamectin benzoate								188		319
					5E	0.3	0.5	0.4	0.5	0.6	0.6	1.1	0.8	0.6	0.4	0.7	0.4	0.4	0.5	0.7	0.5	169
					5M	0.2	0.3	0.55	0.3	0.4	1.2	0.8	0.8	2	2	2.5	2.5	1.6	1.4	1.2	1.2
					5L	0.2	0.08	0.36	0.72	0.4	0.7	0.6	0.9	0.77	0.78	1.54	1.07	0.8	0.7	1.4	1.3				figure3F	Control								Emamectin benzoate
					1 d	0.1	0.1	0.2	0.2	0.4	0.3	0.2	0.25	0.7	1.1	0.9	0.9	1.2	0.9	0.8	1.3				5E	0.5	0.8	0.6	0.5	0.7	0.8	0.5	0.7	0.9	1.7	1.3	1	0.8	0.6	0.8	0.88
					2 d	0.27	0.24	0.19	0.23	0.44	0.55	0.7	0.3	3	2.3	1.3	2.1	0.4	0.3	0.4	0.3				5M	0.1	0.2	0.3	0.3	0.5	0.6	0.5	0.5	0.85	1.2	1.4	1.7	1.6	1.3	1.6	1.7
					3 d	0.18	0.22	0.21	0.26	0.3	0.5	0.36	0.8	1.1	1.1	1.3	1.3	0.4	0.6	0.6	0.5				5L	1	1	1.1	0.9	1.1	1	1	1.2	1.4	1.6	2.4	2.6	0.4	1.8	0.8	2.4
					4 d	0.4	0.3	0.3	0.4	0.5	0.5	0.5	0.7	1.8	1.8	1.7	2.1	1.3	0.9	0.7	0.8				1 d	2	3	2.5	2	2	2.8	3.1	3.3	6	9	9	8	2.6	2.7	4.3	5
					5 d	0.4	0.5	0.5	0.75	1.5	2.1	1.8	1.4	2	2	1.2	1.1	1.4	1.1	1	1				2 d	0.85	1.4	1.5	1.45	1.5	2.1	1.4	1.9	4	5	4	6	4.3	5.1	3.8	3.8
					6 d	0.38	0.42	0.4	0.43	1	0.7	0.7	0.5	1.3	0.5	0.6	0.9	0.3	0.6	0.7	0.7				3 d	1.88	1.4	1.1	1.1	2	2.3	2.7	2.3	3.6	5.8	4.1	4.5	3.8	3.4	3.3	3.4
					7 d	0.8	0.4	0.6	0.46	0.6	1.2	1	1.2	1.1	1.4	1.2	1.4	0.3	0.3	0.4	0.6				4 d	4.7	1.6	1.8	3.6	3.5	3.3	2.7	3.1	7.5	8.2	8.3	12.3	6	5	5	6
																									5 d	9	6	6	9	5	5.8	6.3	6.8	14.5	9.5	11	12	6	8.5	5.7	6.7
																									6 d	3	3	6	6	5.1	3.5	4.8	5	5	4	5	4	6.8	7.1	7.8	8.1
																									7 d	6	5	6	6	6	4.8	5.4	5.3	2.2	5.1	3.2	3.3	6	6	6	5
					figure3G	Control								Emamectin benzoate											figure3H	Control								Emamectin benzoate
					5E	1	0.6	0.86	1.74	0.8	0.5	0.9	0.6	0.5	0.6	0.65	0.7	0.6	0.9	0.6	0.9				5E	0.6	0.4	0.28	0.37	0.44	0.65	1.1	0.89	0.4	0.4	0.4	0.4	0.22	0.36	0.68	0.74
					5M	0.98	1.08	0.94	1.05	0.6	1.2	1.4	0.8	1.7	1.9	1.45	2.65	2.7	4.3	4.7	3.7				5M	0.13	0.1	0.16	0.1	0.12	0.1	0.1	0.1	5.2	7.2	4.8	6	0.5	0.34	0.32	0.36
					5L	0.6	0.7	1.7	1.4	0.9	0.8	1.4	1.2	1.4	1.8	2	2.1	1.7	3	2.5	2.4				5L	0.84	1.12	0.72	1.32	0.87	1.07	0.83	1.27	17.2	7.2	4.8	9.2	1.1	1.2	0.61	2.2
					1 d	0.75	1.43	1.52	1.54	0.5	1.8	1.5	1.1	2.2	2.9	3.4	3.2	3	2.8	2.8	2.8				1 d	5.2	7.2	7.2	8.4	1.7	1	1	1.7	10.4	5.6	3.2	7.6	1.88	2.03	2.2	2.56
					2 d	1.6	2.8	2.4	1.4	1.2	1.2	2.5	2.1	6.2	7.4	9.7	4.96	1.8	1.9	2	2.1				2 d	7.2	10	10.8	6	2	4	3	3	14.8	6	8	5.2	1.74	1.98	2.78	1.62
					3 d	2.1	1.8	1.8	3.4	2.1	2.3	2.4	1.5	5.9	3.8	4.7	4.5	2	3.1	3	2.8				3 d	4	4	4	2.8	1.73	3.52	1.71	2.61	4.2	3.6	3.4	2.8	1.88	2.9	2.03	2.85
					4 d	2	1.6	1.4	1.4	1.2	1.2	1	1.7	5	4	4.7	3.3	4.4	3.3	1.7	1.5				4 d	3.4	3.12	3.12	3	3.71	1.67	1.12	1.09	28	23.2	25.6	24	4	4.4	5.5	4.6
					5 d	1.5	1.4	2.3	1.4	2.1	1.7	1.8	1.9	5.4	8.3	6.9	3.8	3.6	4.3	5	3				5 d	3.76	2.68	3	2.72	4.12	2.95	2.88	2.35	24	19.2	20	16.6	4	12	4	16
					6 d	3.7	3.6	3	4	2.1	2.5	2.5	2.3	2.85	2.74	3.26	2.78	4.4	4	3.4	3.6				6 d	1.4	1.28	1.92	1.72	3.34	2.84	3.41	3.67	1.84	1.68	1.68	1.7	2	2.3	2	2.9
					7 d	1.8	2.4	3.2	1.5	0.7	3.6	2	3.2	2.73	2.63	2.81	3.93	2	3	3	3.5				7 d	1.84	1.68	1.92	1.28	3.7	2.3	4.7	6.2	4	5.2	5.6	6	2.45	2.55	3.05	1.84
					figure3I	Control								Emamectin benzoate											figure3J	Control										Emamectin benzoate
					5E	0.002	0.003	0.002	0.003	0.002	0.003	0.002	0.003	0.001	0.001	0.001	0.002	0.001	0.002	0.001	0.002				5E	96	78	76	79	96	78	76	79	63	64	171	108	100	73	171	108	100	73	171	169
					5M	0.007	0.008	0.008	0.007	0.008	0.007	0.007	0.008	0.009	0.008	0.006	0.008	0.009	0.008	0.009	0.009				5M	8	17	16	17	8	17	14	17	11	12	43	45	47	48	43	45	47	48	53	48
					5L	0.73	1.22	0.99	1.11	1.09	0.95	0.92	1.04	6.6	6.2	7.1	3.9	2.5	2.2	2.6	2.3				5L	57	57	51	42	5	3	5	5	2.8	2	1.06	0.52	0.64	0.6	1.4	0.99	0.68	1.04	0.8	1.25
					1 d	34	32	21	27	7.7	6.1	7.5	7.7	25	19	28	24	17	17	16	17				1 d	3	4.4	4.6	4.3	2	1.5	3.5	4.8	1.3	1	1.39	0.78	0.81	1.12	0.6	1.7	1.42	1.28	1.27	1.77
					2 d	34	31	37	37	9	17	15	16	60	47	54	46	42	64	72	68				2 d	1.8	1.7	1.7	15	1.3	4	2.5	3.5	4	4.2	0.2	0.2	0.2	0.3	0.8	0.9	0.9	1	1.36	1.18
					3 d	25	24	21	19	21	19	17	19	190	188	167	156	58	52	46	56				3 d	4.2	1.8	1.8	1.7	5	5	7	4	5.5	6.2	0.4	0.4	0.3	0.4	1.1	1.5	2	2	1.81	2.58
					4 d	107	175	151	108	61	63	110	60	215	221	255	194	147	134	147	135				4 d	1.1	1.4	1	1.7	13	3	6	17	7	5.3	0.4	0.4	0.2	0.3	1.5	3.7	5.7	3.5	3.1	5
					5 d	123	114	116	117	55	49	48	49	330	279	281	312	297	296	285	316				5 d	1.5	0.7	1.7	1.8	5	7	4	8	4.9	6.3	0.3	0.3	0.3	0.3	2	2	1.5	4.3	1.83	1.9
					6 d	133	191	211	198	77	40	73	49	203	193	231	157	91	85	75	85				6 d	2.6	1.9	1.8	1.7	3	3	3	2.6	3.1	2.8	0.1	0.09	0.1	0.1	6	7	4	6	5	4
					7 d	156	125	158	134	49	64	71	57	180	207	179	203	103	123	144	128				7 d	0.5	0.5	0.5	0.5	1	1	2	2	2.3	2.1	0.4	0.4	0.4	0.5	3	2	3	4	1.33	1.57
					figure3K							figure3L						figure3M
					dsgfp	dsJHAMT	dsgfp	dsJHAMT+EB				dsgfp	dsMet	dsgfp	dsMet+EB			dsgfp	dskr-h1	dsgfp	dskr-h1+EB
					166	121	166	211				166	213	166	294			166	176	166	262
					181	141	181	197				181	146	181	273			181	201	181	274
					174	133	174	236				174	193	174	262			174	189	174	218
					242	128	242	227				242	157	242	289			242	171	242	249
					193	154	193	254				193	181	193	207			193	228	193	255
					155	157	155	188				155	186	155	236			155	151	155	239
					187	164	187	218				187	151	187	185			187	197	187	203
													167
