# Supplementary material for: Pesticide-induced resurgence in brown planthoppers is mediated by action on a suite of genes that promote juvenile hormone biosynthesis and female fecundity
Source: eLife. 2025 Sep 30;12:RP91774. doi: 10.7554/eLife.91774 (PMC12483516; doi:10.7554/eLife.91774)
Supplement: Figure 4—figure supplement 3—source data 1. [file elife-91774-fig4-figsupp3-data1.xlsx]

## Sheet: figure4.S
Figure 4-figure supplement
																								figure4.S3B
				figure4.S3A																					Control				Emamectin benzoate
				Control								Emamectin benzoate												5E	0.03	0.04	0.04	0.07	0.11	0.17	0.22	0.23
			5E	1.6	1.3	0.7	1.4	0.3	0.25	0.21	0.2	0.93	1.2	1.6	2.2	0.4	0.6	0.85	0.24					5M	0.05	0.06	0.07	0.07	0.02	0.02	0.03	0.045
			5M	0.8	0.7	1.23	1.01	0.5	0.25	0.25	0.3	1.1	0.9	0.9	0.8	0.5	0.8	1.05	1.17					5L	0.4	0.4	0.46	0.52	0.12	0.14	0.15	0.18
			5L	0.4	0.5	0.5	0.7	0.1	0.4	0.6	0.85	1.7	2.3	2.3	3.1	1.2	1.2	1.2	2					1	1	1.2	1.2	1.36	0.9	0.84	1.1	1.18
			1	0.6	1.1	1.3	1.25	0.76	1.08	1.15	1.05	1.37	1.69	1.74	1.72	0.95	1.8	1.75	2.1					2	0.5	0.87	0.98	1.32	0.66	0.75	0.74	0.92
			2	0.6	1.1	0.6	0.8	3	3	4.6	5.2	3.7	3.2	3.8	2.3	4.7	4.5	4.7	5.8					3	0.9	0.97	1.32	1.92	0.47	0.65	0.67	0.86
			3	0.7	0.8	0.9	1.2	2.8	4.2	4	4.2	2.06	2.2	2.14	2.05	4.7	4.4	5.2	6.3					4	0.7	0.8	0.8	0.82	0.44	0.44	0.46	0.53
			4	3.1	3.1	4.1	4.2	2.5	2	1.6	2.7	2.5	2.5	2.4	2.4	5	5.5	7	7.5					5	0.72	0.77	0.82	0.98	0.27	0.3	0.41	0.46
			5	0.6	1.1	1.36	3	0.5	0.5	1	0.5	3.2	2.4	2.4	2.5	3.7	3.8	3.9	4.2					6	0.7	0.7	0.84	0.92	0.62	0.73	0.82	0.77
			6	1.3	1	1.1	1.5	1.9	2	2.2	2.3	2.4	3	2.4	4.36	1.1	1.7	2.7	2.7					7	0.82	0.87	1.1	1.5	0.3	0.3	0.32	0.51
			7	1.43	0.91	1.62	1.17	0.4	1.5	3.3	4	3.5	5	2.7	4.5	1.2	1.1	0.9	0.9
																								figure4.S3E
			figure4.S3C											figure4.S3D											Control				Emamectin benzoate
				Control				Emamectin benzoate							Control				Emamectin benzoate					5E	0.06	0.07	0.08	0.09	0.1	0.11	0.13	0.14
			5E	0.14	0.14	0.16	0.19	0.07	0.08	0.08	0.09			5E	0.07	0.08	0.08	0.08	0.07	0.07	0.08	0.08		5M	0.17	0.19	0.23	0.24	0.28	0.4	0.32	0.42
			5M	0.05	0.1	0.1	0.11	0.13	0.14	0.15	0.15			5M	0.03	0.05	0.06	0.1	0.04	0.05	0.05	0.06		5L	1.07	1.26	1.28	1.41	0.22	0.33	0.4	0.31
			5L	0.17	0.22	0.25	0.3	0.15	0.15	0.17	0.18			5L	0.17	0.17	0.18	0.24	0.05	0.06	0.08	0.09		1	0.68	0.73	0.81	1.08	0.6	0.82	1.18	1.67
			1	0.75	0.77	1	1.16	0.84	0.9	1.13	1.17			1	2.3	2.2	2.24	2.25	0.83	1.03	1.04	1.1		2	0.66	0.72	0.82	1.18	0.97	1.21	1.22	1.2
			2	0.38	0.57	0.6	0.61	0.9	0.91	0.97	0.97			2	1.17	1.38	1.39	1.61	0.68	0.75	0.83	0.85		3	0.81	0.88	0.75	1.03	0.38	0.41	0.7	0.73
			3	1.3	1.3	1.22	1.22	1.4	1.43	1.5	1.5			3	1.5	1.51	1.58	1.52	0.65	0.77	0.87	1.36		4	0.68	0.67	0.67	0.54	0.37	0.37	0.4	0.43
			4	0.23	0.23	0.25	1.18	2	3	1.94	3.38			4	1.66	1.67	1.67	1.93	0.58	0.65	0.7	0.75		5	0.36	0.27	0.47	0.63	0.42	0.42	0.44	0.45
			5	0.22	0.32	0.33	0.83	1.77	1.66	1.85	3.6			5	1.68	1.77	1.83	2.15	0.41	0.37	0.38	0.38		6	0.28	0.28	0.36	0.4	0.85	0.86	0.88	1.13
			6	0.23	0.24	0.28	0.4	1.36	1.38	1.42	1.57			6	0.33	0.35	0.38	0.56	0.36	0.54	0.64	0.65		7	0.2	0.21	0.22	0.17	0.41	0.43	0.52	0.77
			7	0.28	0.31	0.33	0.38	0.78	0.81	1.13	1.45			7	0.4	0.52	0.52	0.58	0.25	0.27	0.32	0.45
														figure4.S3G										figure4.S3H
			figure4.S3F												Control				Emamectin benzoate						Control				Emamectin benzoate
				Control				Emamectin benzoate						5E	0.05	0.06	0.07	0.09	0.1	0.12	0.14	0.16			0.9	0.85	1.08	1.2	0.11	0.11	0.19	0.1
			5E	0.1	0.12	0.15	0.16	0.28	0.34	0.37	0.46			5M	0.02	0.02	0.04	0.06	0.2	0.25	0.32	0.34
			5M	0.2	0.25	0.28	0.36	0.07	0.08	0.08	0.12			5L	0.2	0.2	0.24	0.26	0.24	0.24	0.25	0.25
			5L	0.18	0.19	0.28	0.34	0.11	0.12	0.15	0.18			1	0.8	1.25	1.05	1.62	0.76	0.8	1.16	1.4
			1	0.52	0.9	1.22	1.66	0.83	0.99	1.02	1.16			2	0.82	1.08	1.72	1.77	1.07	1.25	1.71	1.85
			2	0.81	0.93	1.24	1.17	0.8	0.84	0.85	0.86			3	1.54	4.2	4.16	4.61	0.83	0.96	1.2	1.28
			3	1.06	1.11	1.31	1.74	0.68	0.46	0.91	1.36			4	1	1.1	1.51	2.17	2.17	2.29	2.7	3.57
			4	0.91	0.94	1.02	1.08	0.44	0.54	0.56	0.47			5	1.66	1.71	3.37	2.44	0.96	1.88	2.22	2.07
			5	0.95	0.75	0.78	0.65	0.24	0.33	0.37	0.44			6	0.32	0.36	0.4	0.58	3.1	3.2	3.9	5.3
			6	0.52	0.55	0.58	0.53	0.17	0.18	0.36	0.48			7	0.55	0.57	0.58	0.93	1.07	1.08	1.2	1.12
			7	0.47	0.63	0.8	0.86	0.23	0.32	0.29	0.45
