# Supplementary material for: Pesticide-induced resurgence in brown planthoppers is mediated by action on a suite of genes that promote juvenile hormone biosynthesis and female fecundity
Source: eLife. 2025 Sep 30;12:RP91774. doi: 10.7554/eLife.91774 (PMC12483516; doi:10.7554/eLife.91774)
Supplement: Figure 4—source data 1. [file elife-91774-fig4-data1.xlsx]

## Sheet: Sheet1
Figure 4. EB induced reproduction in BPH is mediated by the AstA/AstAR and JH signaling pathway.
	figure4A
		Control								Emamectin benzoate
	5E	0.6	0.5	0.7	0.8	0.86	0.9	0.97	1.07	1.48	1.13	0.91	1.38	1.7	1.4	1	1.28
	5M	1.2	0.7	0.8	2.5	0.5	0.5	0.5	0.54	1.16	1.38	1.91	1.39	1.22	1.27	1.2	0.95
	5L	1.4	1.3	1.4	1.3	1.9	2.5	2	2.8	1.47	1.7	1.11	0.412	0.95	0.78	2.1	1.28
	1	5	3	2.8	2.3	1.4	1.4	2	3.3	0.83	1	1.03	1.16	0.9	0.55	1	2
	2	1.7	0.7	1.1	1.2	11	6.6	11.3	12.8	2.9	2.4	2.8	2.8	4.25	3.27	3.6	3.3
	3	3.3	4.7	6.3	3.2	13.8	13.1	5.7	17.5	2.7	2.9	2.7	2.9	1.8	1.35	1.5	0.81
	4	2.9	2.2	2.2	1.8	4.7	6.4	6	6.1	2.3	2	2.2	1.7	4.4	3	3.3	2
	5	1.5	1.4	2.2	2.4	2.8	3	5	5.1	1.6	1.4	1.8	1.9	2	2	1.7	1.8
	6	4.4	3.9	3.8	3.4	3.8	3.9	4.3	5.1	5.8	5.8	5.6	7.8	1	1	0.86	0.9
	7	1.9	1.6	1.87	1.22	2	2	2.3	2.4	2.6	2.4	4.2	3.7	0.66	0.63	0.66	0.6
	figure4B
		Control												Emamectin benzoate
	5E	1.5	1	1.6	1.6	0.57	0.6	0.64	0.74	1.3	1.5	2.8	3	2.2	2.4	2.7	2.3	1.5	1.6	1.35	1.45	6.4	5	5.4	5
	5M	2	2.1	2.2	2.3	0.5	0.5	0.7	0.75	1.6	1.8	1.8	2	1.7	1.9	1.7	1.96	0.46	0.5	0.5	0.5	4	4.5	3.7	3.8
	5L	1.6	2.4	1.37	2.65	2.7	3.2	3.5	3.6	2.4	3	3.6	3.8	1.4	1.9	3.6	3.7	0.7	1	1.03	1.36	4.8	4	4.9	4
	1	1.2	2.1	2.4	2.2	1.5	1.6	1.9	2.3	0.5	1.1	1.2	1.4	1	0.7	1.1	1.2	1.25	1.02	1	0.8	1.5	0.8	0.8	1
	2	8.2	11.5	11.1	13.5	4.3	5	6	6	1.6	1	1.2	2.2	0.85	0.88	0.8	1.03	0.6	0.9	1.5	2	1.6	1.8	2.6	2.4
	3	25	29	15	26	20	20	24	24	5	7	6	6.5	0.93	0.85	0.85	0.85	1.57	1.65	1.9	2	1.4	1	1.25	1.23
	4	11	11	13	13	4	4.5	5.3	6	6.6	6.1	7.6	9	1.1	0.8	0.8	0.9	1.5	1.6	2.2	2.3	0.84	1	1.52	1.54
	5	3	3.3	4	4	2.9	4.7	5.3	5.3	1.1	1.2	1.5	1.5	1.7	1.7	2.1	2.1	3.7	3.7	3.5	4.5	0.9	0.9	1.5	3.6
	6	0.6	0.6	0.6	0.6	2.7	3	3	3.5	1.7	1.7	1.8	3.3	0.45	0.43	0.6	0.35	0.16	0.15	0.15	0.2	1.4	1.8	1.8	1.9
	7	0.7	1	1	0.87	1.6	2	2.3	2.4	1.5	1.9	2.1	2.2	0.4	0.5	0.6	0.6	0.1	0.1	0.1	0.1	3.5	3.6	3.8	3.8
	figure4C
	dsgfp								dsAstAR
	0.9	0.9	1	1.2	0.97	0.98	0.98	1.05	0.2	0.28	0.4	0.52	0.24	0.3	0.32	0.52
				figure4E
					dsgfp				dsAstA-R
					0.922306	0.982456	1.03258	1.06266	1.34336	1.42356	1.50376	1.51378
				figure4F
	figure4D				dsgfp				dsAstA-R
	dsgfp	dsAstA-R			1.01	0.85	1.05	1.08	2	2.1	2.5	2.5
	168	218		figure4G
	146	181			dsgfp				dsAstA-R
	223	336			0.91	0.96	1.02	1.1	1.6	1.68	1.76	1.88
	161	239		figure4H
	178	186			dsgfp				dsAstA-R
	207	203			1.03	1.16	0.86	1.05	7.9	8.2	8.3	9.2
	142	236		figure4I
	187	184			dsgfp												dsAstAR
	211	242			1.2	1.24	1.25	1.23	1.09	0.86	0.86	1.04	1.01	0.95	1		0.74	0.88	1.04	1.24	0.85	0.63	0.72	1.01	0.78	0.71	0.81	1.23
	257	227
	161	274
	157	192
	170	225		figure4J
	224	205		dsgfp	dsAstAR
	173	214		3.648	4.488				figure4K
	187	269		3.824	3.776				DMSO	DMSO+AstA1	DMSO+AstA2	DMSO+AstA3	DMSO+AstA4	DMSO+AstA6	DMSO+AT			figure4L								figure4M
	202	226		3.904	3.696				57	9	14	12	14	17	27			Control	AstA1-2h	AstA1-4h	AstA1-16h	AstA1-48h				Control	AT-2h	AT-4h	AT-16h	AT-48h
	164	277		3.76	4.152				34	21	18	18	21	0	21			3.57	3.07	3.33	2	2.8				3.19	3.65	3.32	2.67	3.32
	194	254		3.576	4.192				26	28	31	21	37	13	42			3.57	3.33	3	2.4	2.68				3.19	3.24	3.49	3.81	3.08
	159	284		3.856	3.872				31	23	44	14	54	11	14			3.66	2.8	3	2.53	2.67				2.67	3.81	2.59	3.15	3.16
	211	217		3.472	4.272				38	18	25	24	40	32	31			3.2	2.26	3.2	2.4	2.65				3.08	3.82	4.14	3.32	2.92
	186	189		3.296	4.288				35	17	40	51	64	26	29			4.13	3.63	3.2	2.4	2.73				3.08	3.62	3.65	3.08	3.24
	218	244		3.48	4.208				44	5	29	29	32	19	35			3.13	3.53	3.53	2.8	2.72				3.08	4.06	3.16	2.84	3.16
	189	235		3.768	4.568				33	42	35	32	11	28	21			4.2	3.73	2.8	2.67	2.46				3.32	3.73	3.89	3.49	3
	246	279		3.896	4.528				27	48	28	16	40	16	33			3.2	4.13	3.67	2.2	2.44				3.49	3.89	3.33	3.16	3
	215	208		3.432	4.656				46	21	36	30	34	26	28			4.6	3.8	2.93	1.93	3				3.09	3.81	4.06	3.41	3.02
	204	249		3.808	3.848				19	6	4	25	22	30	38			4	3.46	3.2	2.13	2.56				3.09	4.22	3.73	3.81	2.92
	218	236		4.048	4.064				34	33	34	28	58	6	56			3.67	3.07	3.13	2	2.6				3.14	3.65	3.32	3.4	3.49
	246	233		3.784	3.846				25	14	41	31	39	20	41			3.2	2.93	3.67	2	2.53				3.15	3.49	3.41	3.65	3
	157	213		3.888	3.952				16	12	37	24	8		36			3.67	2.67	3.2	2.33	2.53				3.09	4.05	3.4	3.57	3.57
	241	255		3.488	3.584				24	34	15	36	35					3.87	3.07	2.87	2.33	3.06				3.32	3.65	3.57	3.24	3.89
	171	204		3.544	4.232				45	8	33	9	17					3.47	3.2	3.2	2.41	3.06				3.33	3.49	2.67	3.41	3.41
	221	260								15	27	17	42													3.79	4.06	3.41	2.59	3.73
	196	286								19	12		33
	186	297								18	14
	236	267								25	28
	193	238									19
	240	257									17
	269	206
	166	234
	207	184
	211	384
	179	285
	228	229
	154	254
	191	277
	229	209
		262
		291
