# Supplementary material for: Pesticide-induced resurgence in brown planthoppers is mediated by action on a suite of genes that promote juvenile hormone biosynthesis and female fecundity
Source: eLife. 2025 Sep 30;12:RP91774. doi: 10.7554/eLife.91774 (PMC12483516; doi:10.7554/eLife.91774)
Supplement: Figure 5—figure supplement 2—source data 1. [file elife-91774-fig5-figsupp2-data1.xlsx]

## Sheet: figure5.S
Figure 5-figure supplement
					figure5.S2A
					dsgfp								dsGlucl
					0.62	0.96	1.46	1.14	0.8	0.88	1.03	1.36	0.76	0.78	0.83	0.97	1	1.07	1.35	1.66
					figure5.S2B
					dsgfp								dsGlucl
					0.79	0.92	1.02	1.33	0.79	0.94	1.22	1.09	0.93	0.95	1.03	1.1	1.05	1.22	1.25	1.4
					figure5.S2C
					dsgfp				dsGlucl
					1.28	0.98	0.76	1.04	1.43	1.41	0.93	1.09
					figure5.S2D
					dsgfp				dsGlucl
					1.42	1.25	0.76	0.73	0.8	1.06	1.73	1.7
					figure5.S2E
					dsgfp				dsGlucl
					0.89	1.12	0.93	1.05	1.57	1.76	2.12	1.98
					figure5.S2F
					dsgfp								dsGlucl
					0.83	0.93	1.07	1.18	0.8	0.96	1.05	1.24	0.8	0.83	0.85	1.03	0.78	0.85	0.98	1.01
					figure5.S2G
					dsgfp				dsGlucl
					1.09	1.13	0.89	0.91	0.91	1.09	1.13	1.13
					figure5.S2H
					dsgfp				dsGluCl
					0.78	0.76	1.51	1.09	1.14	1.74	1.36	1.41
					figure5.S3
						Control						Emamectin benzoate
					1 d	0.376667	1.2305	1.52501	0.495971	1.34581	2.11956	2.49577	0.98626	1.44338	2.23445	1.16533	0.900192
					2 d	4.9784	0.340971	0.741407	3.59602	0.339134	0.651541	3.02645	0.908706	2.42364	0.631595
					3 d	3.88492	0.229773	1.40116	2.52973	0.287864	1.09792	5.65056	4.26488	1.96892	4.95809	7.26151	1.54163
					4 d	1.33026	1.43593	0.428536	1.40108	1.59007	0.548357	1.5568	2.58829	5.58943	2.79417	2.88698	4.63839
