# Supplementary material for: Pesticide-induced resurgence in brown planthoppers is mediated by action on a suite of genes that promote juvenile hormone biosynthesis and female fecundity
Source: eLife. 2025 Sep 30;12:RP91774. doi: 10.7554/eLife.91774 (PMC12483516; doi:10.7554/eLife.91774)
Supplement: Figure 5—source data 1. [file elife-91774-fig5-data1.xlsx]

## Sheet: Sheet1
Figure 5. Role of EB and the GluCl channel in fecundity and juvenile hormone signaling in BPH																																			figure5C	dsgfp	dsGlucl	dsgfp+EB	dsGlucl+EB		figure5D	dsgfp	dsGlucl
																																				204	124	183	193			3.57	3.06
																																				194	179	212	204			3.57	3.06
	figure5A																																			173	157	224	155			3.66	2.8
		Control								Emamectin benzoate																										214	168	199	181			3.2	2.93
	5E	1.88	1.78	1.32	1.5	1.22	1.08	1.17	1.13	0.2	0.3	0.35	0.5	0.88	1.03	0.86	0.75																			188	135	166	166			4.13	2.67
	5M	2.5	2.4	3.5	3.01	1.24	1.53	1.38	1.46	0.8	1.33	1.44	1.55	1.22	1.53	1.56	1.43																			259	184	239	209			3.13	2.2
	5L	0.64	0.73	0.81	1.06	0.89	1.04	1.22	1.17	1.7	1	1.1	1.5	1.36	1.23	1.11	1.42		figure5B																	168	209	208	243			4.2	2.67
	1	0.55	0.71	1.44	1.75	0.88	0.64	0.76	0.53	0.88	0.86	0.9	0.95	0.93	0.76	0.85	1.24		dsgfp						dsGlucl											244	155	286	196			3.2	2.62
	2	0.45	0.6	0.61	1.58	1.2	1.15	1.1	0.84	1.7	1.8	3.5	2.1	1.02	1.14	1.03	0.85		0.7	0.65	0.81	0.95	1.2	1	0.3	0.31	0.46	0.47	0.24	0.24	0.27	0.3				177	194	254	177			4.6	2.73
	3	0.7	0.8	0.5	0.57	0.56	0.53	0.64	0.76	0.3	0.4	0.6	0.7	0.86	0.75	0.93	0.91																			159	138	219	218			4	2.53
	4	1	1.2	1.5	1.8	1.2	1.3	1.24	1.33	0.75	0.87	0.9	1	1.2	1.13	1.12	1.07																			208	164	243	235			3.67	2.86
	5	1.1	1.5	1.7	2	1.12	1.34	1.55	1.75	2	2.4	2.5	2.7	1.53	1.88	1.23	2.04																			169	151	188	164			3.2	2.86
	6	0.84	0.93	1	1.7	1.83	1.63	0.55	0.74	0.37	0.8	0.9	0.68	1.23	1.27	1.35	0.98																			194	163	159	174			3.67	3.13
	7	0.3	0.4	0.5	0.5	0.76	0.73	0.59	0.64	0.56	0.88	1.06	1.25	0.76	0.94	0.88	0.74																			217	188	184	187			3.87	2.67
																																				222	128	235	202			3.47	2.21
	figure5E																																			186	224	216	212
	dsgfp								dsGlucl																											236	177	259	244
	0.84	0.92	0.99	1.28	0.83	0.92	0.98	1.32	0.51	0.58	0.59	0.64	0.54	0.7	0.74	0.97																				193	184	334	209
																																				240	166	271	286
	figure5F																																			269	172	175	264
	dsgfp								dsGlucl																											166	187	208	275
	0.73	1	1.05	1.3	0.88	0.92	1.04	1.17	0.57	0.6	0.67	0.63	0.27	0.44	0.45	0.48																				207	229	257	250
																																				211	208	268	241
	figure5G																																			179	174	219	180
	dsgfp								dsGlucl																											228	195	248	201
	0.77	0.94	1.14	1.18	0.7	1.02	1.06	1.3	0.78	0.86	1.02	1.11	0.53	0.58	0.65	0.77																				154	211	274	175
																																				191	230	189	178
	figure5H																																			229	154		146
	dsgfp				dsGlucl																																		213
	0.8	0.95	1.01	1.3	0.82	0.92	1.01	1.08
	figure5I
	dsgfp				dsGlucl
	0.91	0.92	1	1.17	0.71	0.78	1.06	1.23
